# Supplementary material for: Who lives in care homes in Greenland? A nationwide survey of demographics, functional level, medication use and comorbidities
Source: PubMed Central journal article supplement (PMC8449891; doi:10.1186/s12877-021-02442-0), 2021-09-18
Supplement: 12877_2021_2442_MOESM3_ESM.pdf [file 12877_2021_2442_MOESM3_ESM.pdf]

Barthel

ADL index (BAI): Hvad gør

Beboer:

Fødselsdato:

NR

| FUNKTION                                 | SCORE | BESKRIVELSE af hvad han/hun gør:                                     |
|------------------------------------------|-------|----------------------------------------------------------------------|
| Tarm                                     | 0     | Inkontinent for afføring / Brug for laxantia ved hjælp af personale. |
|                                          | 1     | Uheld af og til - max 1 gang om ugen.                                |
|                                          | 2     | Kontinent: Kan holde på afføringen.                                  |
| Blære                                    | 0     | Inkontinent eller har catheter, som passes af andre.                 |
|                                          | 1     | Uheld af og til - max 1 gang om dagen.                               |
|                                          | 2     | Kontinent (mere end 7 dage).                                         |
| Personlig<br>Hygiejne                    | 0     | Hjælp til: Tandbørstning, barbering, frisere sig, vaske ansigt.      |
|                                          | 1     | Kan selv, evt efter opfordring.                                      |
| Toiletbesøg                              | 0     | Afhængig af hjælp (af- på, tøj ned-op, tørres).                      |
|                                          | 1     | Kan noget selv, men har brug for lidt hjælp.                         |
|                                          | 2     | Kan alt selv (af-på, tøj ned-op, tørre sig).                         |
| Spisning                                 | 0     | Skal hjælpes med alt.                                                |
|                                          | 1     | Hjælp til: Skære i stykker, smørre brød, mv.                         |
|                                          | 2     | Kan selv spise, når maden sættes frem.                               |
| Seng-til-stol                            | 0     | Kan intet - ikke balance til at sidde.                               |
|                                          | 1     | Kan sidde, men kræver fysisk hjælp af 1 - 2 personer.                |
|                                          | 2     | Kan selv, men skal opfordres og forklares (verbal hjælp).            |
|                                          | 3     | Kan og gør selv - uafhængig af hjælp.                                |
| Mobilitet:<br>Komme omkring<br>indendørs | 0     | Immobil.                                                             |
|                                          | 1     | Kørestol, klarer sig helt selv.                                      |
|                                          | 2     | Kan gå med hjælp fra 1 person (verbal eller fysisk).                 |
|                                          | 3     | Kan selv - Uafhængig af hjælp.                                       |
| Påklædning                               | 0     | Kan intet - Skal hjælpes med alt.                                    |
|                                          | 1     | Kan ca ½ selv. Hjælpes med f.eks. knapper, lynlås, snørrebånd.       |
|                                          | 2     | Kan selv - Uafhængig af hjælp.                                       |
| Trappegang                               | 0     | Kan ikke.                                                            |
|                                          | 1     | Kan noget, men skal have hjælp.                                      |
|                                          | 2     | Kan selv - Uafhængig af hjælp op og ned.                             |
| Bad                                      | 0     | Kan ikke uden hjælp under en eller anden form.                       |
|                                          | 1     | Kan alt selv - Uafhængig af hjælp.                                   |

SUM:

=====

---

**DELTAGER:**

- i. Mand   
ii. Kvinde   
b. Højde \_\_\_\_\_ cm  
c. Vægt \_\_\_\_\_ kg  
d. Alder \_\_\_\_\_ år  
e. Far født på Grønland Ja  Nej   
f. Mor født på Grønland Ja  Nej

2. **Knoglebrud:** Ja  Nej  Type: \_\_\_\_\_

3. Alder for sidste menstruation: \_\_\_\_\_ år

4. **Tobak - Cigaretter:**

- a. aldrig   
b. holdt op   
c. 1-10   
d. 11-20   
e. flere end 20   
f. \_\_\_\_\_

5. **Alkohol:**

- a. aldrig   
b. 0-7 genstande pr uge   
c. 8-14 genstande pr uge   
d. 15-21 genstande pr uge   
e. mere end 21 genstande pr uge   
f. \_\_\_\_\_

---

**PLEJE:**

1. Plejehjem - Ankomst Mdr. \_\_\_\_\_ År \_\_\_\_\_  
a. Varighed: \_\_\_\_\_  
b. Årsag: \_\_\_\_\_  
c. UDE  <1  1-3  >3 timer/dag

2. Får **Vitaminer:**

- (1) Aldrig   
(2) Af og til   
(3) Daglig

Hvis ja, indeholder de da

- (a) **Jod:** Ja  Nej  Ved ikke   
(b) **D-vit** Ja  Nej  Ved ikke   
(c) **Calcium** Ja  Nej  Ved ikke

---

**JOURNAL:**

3. **Anden sygdom:** Ja  Nej

4. **Hvis ja, hvilke:**

- i. 19 \_\_\_\_\_  
ii. 19 \_\_\_\_\_  
iii. 19 \_\_\_\_\_  
iv. 19 \_\_\_\_\_

5. Får du **Medicin:** Ja  Nej

- (1) \_\_\_\_\_  
(2) \_\_\_\_\_  
(3) \_\_\_\_\_  
(4) \_\_\_\_\_

- b. Prednisolon Ja  Nej  Dosis /Varighed: \_\_\_\_\_  
c. Hormon / Østrogen Ja  Nej  Dosis /Varighed: \_\_\_\_\_
